# Supplementary material for: Understanding Low-Acuity Visits to the Pediatric Emergency Department
Source: PubMed Central journal article supplement (PMC4471269; doi:10.1371/journal.pone.0128927), 2015-06-17
Supplement: pone.0128927.s001.pdf [file pone.0128927.s001.pdf]

## Appendix 1: Survey Tool

Survey # \_\_\_\_\_

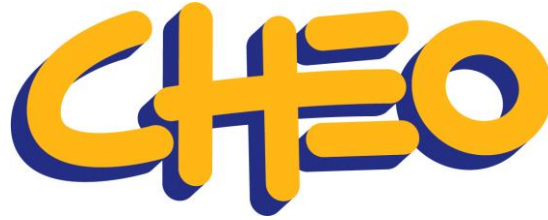

### Understanding Low Acuity Visits to the Emergency Department

Your child has been seen by the Triage Nurse and found to have a problem that is considered by the Ministry of Health to be 'Low Acuity'. That means that your child's condition is stable and **may** have been safely and effectively managed by other providers in the community.

In an effort to provide better care, we want to understand your reasons for coming to the CHEO Emergency Department today. We also want to understand what other health care options you considered or attempted to access, prior to coming to the Emergency Department.

Please complete this brief survey while waiting to see the doctor or nurse practitioner. Please deposit it in one of the survey collection boxes throughout the Emergency Department. In addition to your survey responses, we would like to collect some basic information from your child's chart, such as which region you live in, how long you waited to be seen by the doctor, and what types of tests or treatments your child required for this visit.

Your participation is voluntary. Participating will not change the care your child receives today, or the length of time you have to wait. Your answers will be kept anonymous and only information about groups of patients will be reported.

By returning a completed survey, we will assume that you have consented to participate in both the survey and review of your child's chart. If you choose to **NOT** have your child's chart information included in the results, please check below before returning your survey.

**Do NOT use my child's information in this study.**

**Thank you!**

For information about this survey, please contact:

Dr. Ken Farion  
Acting Medical Director, ED  
(613) 737-7600 x2318

Megan Wright  
Operations Director, ED  
(613) 737-7600 x2333

## Appendix 1: Survey Tool

### 1. Do you have a regular healthcare provider for your child?

- Yes (Please continue to Question #2)                       No (Please skip to Question #4)

### 2. Choose the type of regular healthcare provider that you have for your child:

- Family Doctor                                               Public Health Clinic/CLSC  
 Pediatrician                                                 Naturopath, Chiropractor, or  
 Nurse Practitioner                                              Homeopath  
 Walk-in or Urgent Care Clinic                                       Other: \_\_\_\_\_  
(first come, first served)

### 3. If you selected *Family Doctor, Pediatrician or Nurse Practitioner* above, in what type of practice do they work? Otherwise, if you selected one of the other options, please skip to Question #4.

- Independent office or small group practice  
 Family Health Network or Family Health Team  
 Unsure

### 4. Which of the words or phrases below represents the CHEO Emergency Department for you? Please choose all that apply.

- Access to everything my child needs for care                       Rushed and disorganized  
 Very long waits                                               Trust that things will be done right  
 Convenience with my busy life                                       Impersonal or not interested in my child  
 Only as a last resort                                               Care by pediatric experts  
 Opportunity for a second opinion

### 5. What is the main problem that brought you to the Emergency Department today? (Please choose the **ONE** problem that was most concerning to you)

- Fever                                                               Broken bone, sprain or other limb/joint pain or injury  
 Vomiting and/or diarrhea                                               Tooth or mouth injury, pain, or infection  
 Cough, stuffy nose or difficulty breathing                                               Diet or feeding problems  
 Ear ache or sore throat                                               Swallowed object or object in the nose, ear or skin  
 Tummy pain or constipation                                               Rash, bite or other skin condition  
 Urinary (pee) symptoms or genital concerns                                               Mental health (depression, anxiety) or parenting issue  
 Headache, dizziness, confusion                                               Other: \_\_\_\_\_  
 Head injury or concussion  
 Laceration or cut/scrape

**Appendix 1: Survey Tool**

**6. How long has your child had the main symptom or problem that brought you to the Emergency Department today?**

- 0-4 hours
- 4-12 hours
- 12-24 hours
- 1-3 days
- 4-7 days
- 1-4 weeks
- More than 4 weeks

**7. When you decided to come to the Emergency Department, how soon did you expect to be seen by a doctor for your child’s symptom or problem?**

- Immediately
- Within 30 minutes
- Within 1 hour
- Within 2 hours
- Within 4 hours
- More than 4 hours

**8. Before coming to CHEO, what other ways did you try to get care for your child? Please select all that apply.**

- Telehealth Ontario or Québec Info Santé line
- My regular healthcare provider office for an appointment
- My regular healthcare provider after-hours telephone advice line
- Walk-in/Urgent Care/Public Health Clinic/CLSC
- Another Emergency Department
- Other: \_\_\_\_\_
  
- I did not try another option because I thought the CHEO Emergency Department was the most appropriate place for care of my child’s problem.
  
- I did not try another option because I did not know of any other options.

**9. For each of the other ways you tried in question #6, please briefly describe why the option was not adequate to meet your child’s needs.**

---

---

---

**10. Do you have any further comments about this topic or suggestions for making CHEO’s Emergency Department better?**

---

---

---

---
