# Supplementary material for: Understanding Low-Acuity Visits to the Pediatric Emergency Department
Source: PubMed Central journal article supplement (PMC4471269; doi:10.1371/journal.pone.0128927), 2015-06-17
Supplement: pone.0128927.s002.pdf [file pone.0128927.s002.pdf]

**S2: Data Collection Form**  
**DATA COLLECTION FORM**  
**Understanding Low Acuity Visits to the**  
**Emergency Department**

**Assigned Survey #:** | PLACE LABEL HERE |

1. Patient Age:  0-30 d     1-3 m     4-6 m     7-11 m  
 1-3 y     4-6 y     7-10 y     11-14y     15-18y
2. Postal Code: \_\_\_\_\_ (X0X if outside Canada or unknown)
3. Primary Care:  None     Other     Indep FD     Indep Ped     FHT/FHN
4. Day of Arrival:  Weekday (**Monday 08:00 – Friday 17:00**)  
 Weekend (**Friday 17:00 – Monday 08:00 + Stats**)
5. Time of Arrival (T1): \_\_\_\_ : \_\_\_\_ (24-hour clock)
6. Time of MD Assessment: \_\_\_\_ : \_\_\_\_     Next day
7. Time of Discharge: \_\_\_\_ : \_\_\_\_     Next day

**TO BE COMPLETED BY MD/NP/FELLOW/RESIDENT – PLEASE KEEP WITH CHART**

8. Were any interventions performed?  No     Yes (*If yes, check all that apply*).

- |                                                                                                                                                                                                                                                                                                                                                                                                                                           |                                                                                                                                                                                                                                                                                                                                                                                                                                  |
|-------------------------------------------------------------------------------------------------------------------------------------------------------------------------------------------------------------------------------------------------------------------------------------------------------------------------------------------------------------------------------------------------------------------------------------------|----------------------------------------------------------------------------------------------------------------------------------------------------------------------------------------------------------------------------------------------------------------------------------------------------------------------------------------------------------------------------------------------------------------------------------|
| <input type="checkbox"/> Oral fever control<br><input type="checkbox"/> Oral pain control<br><input type="checkbox"/> Other oral medication<br><input type="checkbox"/> Inhaled medication<br><br><input type="checkbox"/> Plain X-rays<br><input type="checkbox"/> CT/US/MRI<br><br><input type="checkbox"/> Wound closure (glue/tapes)<br><input type="checkbox"/> Wound closure (sutures)<br><br><input type="checkbox"/> Consultation | <input type="checkbox"/> Urinalysis<br><input type="checkbox"/> Urine catheterization<br><input type="checkbox"/> Throat swab<br><input type="checkbox"/> Blood work/other labs<br><br><input type="checkbox"/> Intravenous fluids<br><input type="checkbox"/> Intravenous medication<br><br><input type="checkbox"/> Splint or cast<br><input type="checkbox"/> Procedural sedation<br><br><input type="checkbox"/> Other _____ |
|-------------------------------------------------------------------------------------------------------------------------------------------------------------------------------------------------------------------------------------------------------------------------------------------------------------------------------------------------------------------------------------------------------------------------------------------|----------------------------------------------------------------------------------------------------------------------------------------------------------------------------------------------------------------------------------------------------------------------------------------------------------------------------------------------------------------------------------------------------------------------------------|

9. Diagnosis: ① \_\_\_\_\_  
 ② \_\_\_\_\_

10. Disposition:                     Discharged to home     Admitted to CHEO     LWBS

11. Next Follow-up:
- No specific F/U (RTER prn, F/U FD)
  - See F/D in specific amount of time
  - Return to ED at specific time (R/A, test, imaging)
  - Referral to CHEO specialist or clinic
  - Patient was admitted to the floor
  - Patient LWBS
